# Supplementary material for: Decrease in the frequency of impeded-by-stent phenomenon in the current-model bioresorbable polymer-coated sirolimus-eluting stent
Source: Research Square preprint supplement (doi:10.21203/rs.3.rs-6832103/v1), 2025-07-14
Supplement: Supplementary file 1 [file ea059e889aabc48696506974.xlsx]

## Sheet: Raw data
1年後のCAG	1年後のfollow upの可否	1年後のfollow up何日後	1年後のTLR	1年後の死亡	ID	性別	年齢	TLF censor	1年後の非致死性MI	%DS (before)	1VD	ACC分類	CTO lesion	Concentric / Excentric	Calcified lesion	Bifurcation lesion	De novo lesion	Fr.	Imaging device	lesion length	Lesion length (QCA)	MLD (before)	Post balloon size	Pre balloon size	proximal tortuousity	Reference diameter	グループ	STENT径1	STENT長1	Target Lesion	Target Lesion 2	STENT2	STENT径2	STENT長2	thrombus	アプローチ	ガイドエクステンション	後拡張	合併症	合併症の有無	術者1	前拡張	透視時間	透視時間秒	病変部位	Debulking device4	lesion angulation	KBT	PCI後のCPK
N	Y	188	N	N	72347377	F	82	N	N	37	3VD	B2	N	Excentric	none	N	Y	6	Y	tubular	16.02	1.1		2.25	moderate	1.75	Nagomi	2.5	24	LCX						Rt.TFI	N	N		N	八戸 大輔	Y	6	9	#13	N	none	0	134
N	Y	409	N	N	72347097	M	83	N		84	2VD	B2	N	Excentric	none	N	Y	6	Y	tubular	19.29	0.34		2	none	2.15	Nagomi	2.25	38	LCX					N	Rt.TFI	N	N		N	只野 雄飛	Y	7	19	#13	N	moderate	0	46
N	Y	217	N	N	72347761	M	70	N		55	1VD	B2	N	Excentric	none	N	Y	6	Y	tubular	10.15	0.79	3.5	2.5	none	1.74	Nagomi	2.5	44	LAD					N	Rt.TRI	N	Y		N	杉江 多久郎	Y	8	28	#7	N	moderate	0	38
N	Y	359	N	N	72347123	M	74	N		80	3VD	B2	N	Excentric	none	Y	Y	6	Y	tubular	15.75	0.38	3.0	2.5	none	1.93	Nagomi	2.5	50	RCA					N	Lt.TRI	N	Y	Slow flow / no reflow	Y	森田 祐介	Y	15	58	#3	N	none	1	139
	N	0	N		72346804	F	67			62	3VD	C	N	Excentric	moderate	N	Y	6	Y	diffuse	29.22	0.99		2.25	none	2.62	Nagomi	2.5	50	LAD					N	Rt.TRI	N	N		N	只野 雄飛	Y	9	2	#7	N	none	0	120
Y	Y	334	N	N	72347259	M	73	N		65	3VD	B2	N	Excentric	none	N	Y	6	Y	tubular	13.01	0.75		2.5	none	2.19	Nagomi	2.5	28	LCX					N	Rt.TRI	N	N		N	鹿島 由史	Y	7	1	#13	N	none	0	150
N	Y	335	N	N	12865556	F	73	N		55	2VD	C	N	Excentric	none	N	N	6	Y	tubular	10.13	1.1		3.25	moderate	2.42	Nagomi	2.5	18	LAD					N	Lt.TRI	N	N		N	杉江 多久郎	Y	24	9	#7	N	severe	0	145
	Y	194	N	N	72347006	M	81	N		65	2VD	B2	N	Excentric	none	Y	Y	6	Y	discrete	7.33	0.7	2.5	2.25	none	1.99	Nagomi	2.25	38	LCX					N	Rt.TRI	N	Y		N	鹿島 由史	Y	13	44	#13	N	moderate	1	228
N	Y	339	N	N	72347220	M	72	N		42	2VD	C	N	Excentric	none	Y	Y	6	Y	diffuse	20.2	1.19		2.5	none	2.05	Nagomi	2.5	50	LAD					N	Rt.TRI	N	N		N	松名 伸記	Y	13	48	#7	N	none	1	132
N	Y	373	N	N	72347375	F	81	N	N	42	1VD	B1	N	Excentric	none	N	Y	6	Y	discrete	5.77	1.23		2.5	none	2.13	Nagomi	2.5	18	LAD					N	Rt.TRI	N	N		N	士反 英昌	Y	6	9	#7	N	none	0	71
N	Y	322	N	N	72347192	F	76	N		73	2VD	B2	N	Excentric	none	N	Y	6	Y	tubular	11.59	0.65	3.0	2.5	none	2.38	Nagomi	2.5	28	LCX					N	Rt.TRI	N	Y		N	渡邊 智彦	Y	9	38	#13	N	none	0	50
N	Y	388	N	N	72348111	M	87	N	N	100	1VD	C	Y	Excentric	none	N	Y	7	Y	tubular				2	moderate		Nagomi	2.25	24	RCA					N	Rt.TRI	Y	N	冠動脈破裂 / 穿孔	Y	渡邊 智彦	Y	61	36	#4PD	N	none	0	96
	N	0	N		72347537	M	95			49	1VD	B2	N	Excentric	none	N	Y	6	Y	tubular	15.15	0.74	3.0	2	none	1.46	Nagomi	2.25	38	LAD					N	Rt.TRI	N	Y		N	金子 海彦	Y	17	13	#7	N	none	0	360
N	Y	320	N	N	72347015	M	72	N		63	2VD	C	N	Excentric	none	Y	Y	6	Y	diffuse	12.86	0.61	2.5	2.25	none	1.68	Nagomi	2.25	33	LAD					N	Rt.TRI	N	Y		N	藤田 勉	Y	29	39	#7	N	moderate	1	65
N	Y	309	N	N	71888031	F	62	N		50	2VD	B2	N	Excentric	none	N	Y	6	Y	tubular	10.74	1		2.25	moderate	2	Nagomi	2.5	18	RCA					N	Rt.TRI	N	N		N	只野 雄飛	Y	17	6	#4PD	N	moderate	0	97
N	Y	400	N	N	72346500	M	69	N		37	1VD	B1	N	Excentric	none	N	Y	6	Y	discrete	4.73	1.09	2.25	2.25	none	1.74	Nagomi	2.25	28	LAD					N	Rt.TRI	Y	Y		N	金子 海彦	Y	19	26	#7	N	none	0	58
Y	Y	272	N	N	72346581	M	61	N		70	2VD	B2	N	Excentric	none	N	Y	6	Y	tubular	14.45	0.64	3.0	2	none	2.11	Nagomi	2.5	28	LCX					N	Rt.TRI	N	Y		N	只野 雄飛	Y	13	17	#13	N	none	0	44
N	Y	381	N	N	72348151	F	88	N		60	2VD	B1	N	Excentric	none	N	Y	6	Y	discrete	6.93	0.99	3.25	2.5	none	2.49	Nagomi	2.5	21	LCX					N	Rt.TRI	N	Y		N	藤田 勉	Y	14	54	#14	N	none	0	106
N	Y	390	N	N	72347610	F	62	N		69	2VD	C	N	Excentric	none	N	Y	6	Y	diffuse	20.18	0.52		2.25	severe	1.66	Nagomi	2.5	38	LAD					N	Rt.TRI	N	N		N	森田 祐介	Y	6	38	#7	N	moderate	0	107
N	Y	360	N	N	72348206	F	77	N		57	2VD	B2	N	Excentric	none	N	Y	6	Y	tubular	12.79	1.06	3.0	2.5	none	2.45	Nagomi	2.5	18	LAD					N	Rt.TRI	N	Y		N	森田 祐介	Y	9	26	#7	N	none	0	87
N	Y	382	N	N	72343975	M	63	N		39	1VD	B1	N	Excentric	none	N	Y	6	Y	discrete	7.05	1.38	3.0	2.5	none	2.28	Nagomi	2.5	38	LAD					N	Rt.TRI	N	Y		N	松名 伸記	Y	16	6	#7	N	none	0	104
N	Y	397	N	N	72347731	M	82	N		64	2VD	B1	N	Excentric	none	N	Y	6	Y	discrete	9.07	0.74	2.5	2.25	none	2.04	Nagomi	2.25	15	LCX					N	Rt.TRI	N	Y		N	鹿島 由史	Y	6	53	#14	N	none	0	44
N	Y	140	N	N	71667142	F	94	N		63	1VD	B1	N	Excentric	none	N	Y	6	Y	discrete	7.01	0.59		2	none	1.59	Nagomi	2.25	18	RCA					N	Rt.TFI	Y	N		N	堀田 怜	Y	25	30	#4PD	N	none	0	561
Y	Y	271	N	N	72347715	M	70	N		61	1VD	B2	N	Excentric	none	N	Y	6	Y	tubular	14.92	0.69		2	none	1.78	Nagomi	2.25	28	LCX					N	Rt.TRI	N	N		N	菅野 大太郎	Y	8	57	#13	N	none	0	521
N	Y	409	N	N	72347732	M	36	N		100	1VD	B2	N	Excentric	none	N	Y	6	Y	tubular		1	2.5	2	none		Nagomi	2.25	15	RCA					Y	Rt.TRI	N	Y		N	森田 祐介	Y	18	40	#4AV	N	none	0	946
Y	Y	390	N	N	71881763	M	70	N		72	1VD	B2	N	Excentric	none	Y	Y	7	Y	tubular	13.07	0.6	2.5	2.5	none	2.16	Nagomi	2.5	21	LAD					N	Rt.TFI	N	Y		N	杉江 多久郎	Y	23	39	#7	Y	none	0	133
N	Y	8	N	Cardiac Death	72343226	M	81	Y		53	2VD	B2	N	Excentric	none	N	Y	6	Y	discrete	8	0.72	2.0	2.25	none	1.54	Nagomi	2.25	24	LAD					N	Rt.TRI	N	Y		N	杉江 多久郎	Y	15	6	#8	N	moderate	0	122
N	Y	377	N	N	71318533	M	68	N		66	2VD	C	N	Excentric	none	N	Y	6	Y	diffuse	21.54	0.76	3.0	2.5	none	2.2	Nagomi	2.5	28	LCX					N	Rt.TRI	N	Y		N	杉江 多久郎	Y	14	6	#13	N	none	0	259
N	Y	395	N	N	71234606	M	74	N		43	2VD	B2	N	Excentric	none	Y	Y	6	Y	discrete	12.19	1.25		2.5	none	2.19	Nagomi	2.5	24	LCX					N	Rt.TRI	N	N		N	森田 祐介	Y	8	16	#13	N	none	0	71
N	Y	223	N	N	72347126	M	93	N		62	1VD	B1	N	Excentric	none	N	Y	6	Y	discrete	14.07	0.73	3.0	2.5	none	1.91	Nagomi	2.5	33	RCA					N	Rt.TRI	N	Y		N	士反 英昌	Y	9	52	#3	N	none	0	58
N	Y	394	N	N	72347860	M	69	N		61	1VD	B2	N	Concentric	none	N	Y	6	Y	tubular	18.55	1.14	3.0	2.25	none	2.89	Nagomi	2.25	24	LAD					N	Rt.TRI	N	Y		N	金子 海彦	Y	19	29	#7	N	moderate	0	61
N	Y	373	N	N	72061187	M	83	N		31	2VD	B2	N	Excentric	moderate	N	Y	6	Y	tubular	11.28	1.48		3.5	none	2.16	Nagomi	2.25	18	RCA	RCA				N	Rt.TRI	Y	N		N	杉江 多久郎	Y	24	38	#2	N	none	0	128
N	Y	375	N	N	72348376	M	84	N		75	1VD	C	N	Excentric	none	Y	Y	6	Y	diffuse	24.13	0.41		2.25	none	1.64	Nagomi	2.5	50	LAD			2.25	38	N	Rt.TRI	N	N		N	辻本 誠長	Y	67	9	#7	Y	moderate	0	254
N	Y	338	N	N	72061187	M	83	N		47	2VD	B2	N	Excentric	moderate	N	Y	6	Y	tubular	4.3	1.42	2.5	2.5	none	2.67	Nagomi	2.5	21	LCX					N	Rt.TFI	N	Y		N	金子 海彦	Y	15	46	#11	N	moderate	0	22
N	Y	291	N	N	72348467	F	69	N		51	3VD	B2	N	Excentric	none	N	Y	6	Y	tubular	10.57	0.91		2.5	none	1.88	Nagomi	2.5	28	LCX					N	Rt.TRI	N	N		N	杉江 多久郎	Y	14	1	#11	N	none	0	59
N	Y	386	N	N	72342026	M	70	N		61	2VD	B2	N	Excentric	none	Y	Y	6	Y	tubular	13.31	0.84	2.5	2.5	none	2.17	Nagomi	2.5	38	LAD					N	Rt.TRI	N	Y		N	只野 雄飛	Y	12	5	#7	N	none	0	57
N	Y	199	N	N	72348493	F	73	N		59	1VD	C	N	Excentric	none	N	Y	6	Y	diffuse	13.09	0.69	2.25	2.25	none	1.69	Nagomi	2.25	28	LCX					N	Rt.TFI	N	Y		N	只野 雄飛	Y	6	29	#13	N	none	0	93
N	Y	396	N	N	72348513	F	75	N		46	1VD	B2	N	Excentric	none	N	Y	6	Y	discrete	9.47	1.15	3.0	2.5	moderate	2.14	Nagomi	2.5	21	LCX					N	Rt.TRI	N	Y		N	松名 伸記	Y	33	18	#11	N	moderate	0	110
N	Y	360	N	N	72348012	M	60	N		100	1VD	C	N	Excentric	none	N	Y	6	Y	diffuse		0		2.25	none		Nagomi	2.25	38	LAD					N	Rt.TRI	N	N		N	松名 伸記	Y	28	28	#9	N	none	0	120
N	Y	361	N	N	72348318	M	76	N		67	2VD	B2	N	Excentric	none	N	Y	6	Y	tubular	11.71	0.79	3.0	2.25	none	2.37	Nagomi	2.5	18	RCA					N	Rt.TRI	N	Y		N	只野 雄飛	Y	8	51	#4PD	N	none	0	88
N	Y	174	N	N	72347562	F	92	N		64	1VD	B2	N	Excentric	moderate	Y	Y	6	Y	tubular	19.59	0.75	3.25	2.25	none	2.09	Nagomi	2.5	28	LAD					N	Rt.TRI	N	Y		N	小林 健	Y			#6	N	none	0	105
N	Y	306	N	N	72340467	M	72	N		49	2VD	B1	N	Excentric	none	N		6	Y	discrete	9.81	0.74		2.25	none	1.44	Nagomi	2.25	15	LCX					N	Rt.TRI	N	N		N	藤田 勉	Y	10	52	#14	N	none	0	55
N	Y	342	N	N	12509701	M	80	N		63	1VD	B2	N	Excentric	none	N	Y	6	Y	discrete	8.14	0.87		2.5	moderate	2.36	Nagomi	2.5	15	LCX					N	Rt.TRI	N	N		N	只野 雄飛	Y	6	21	#14	N	none	0	74
N	Y	270	N	N	72347613	M	69	N		58	3VD	B1	N	Excentric	none	N	Y	6	Y	discrete	9.73	0.83		2.25	none	1.99	Nagomi	2.25	18	RCA					N	Rt.TRI	Y	N		N	只野 雄飛	Y	8	21	#4PD	N	none	0	42
N	Y	343	N	N	72348318	M	76	N		67	2VD	B2	N	Excentric	none	N	Y	6	Y	tubular	11.71	0.79	3.0	2.25	none	2.37	Nagomi	2.5	18	RCA					N	Rt.TRI	N	Y		N	只野 雄飛	Y	8	51	#4PD	N	none	0	98
N	Y	205	N	N	72343684	M	92	N		69	2VD	B2	N	Excentric	none	N	Y	6	Y	discrete	9	0.49		2.5	none	1.58	Nagomi	2.5	21	LCX					N	Rt.TFI	N	N		N	森田 祐介	Y	8	23	#11	N	none	0	70
N	Y	373	N	N	72348442	F	53	N		69	1VD	C	N	Excentric	moderate	N	Y	6	Y	diffuse	17.9	0.67		2.5	none	2.15	Nagomi	2.5	50	LAD					N	Rt.TRI	N	N		N	堀田 怜	Y	12	0	#7	N	moderate	0	61
N	Y	247	N	N	72348583	M	88	N		52	1VD	B2	N	Excentric	none	N	Y	6	Y	tubular	5.77	0.98	3.0	2.5	none	2.03	Nagomi	2.5	21	LCX					N	Rt.TRI	N	Y		N	渡邊 智彦	Y	9	39	#15	N	none	0	77
N	Y	239	N	N	72348532	M	79	N		53	1VD	B2	N	Excentric	none	Y	Y	6	Y	tubular	16.43	0.94	2.5	2.5	none	2.01	Nagomi	2.5	24	LCX						Rt.TRI	N	Y		N	竹内 剛	Y	20	12	#13	N	none	0	95
N	Y	48	N	Non-Cardiac Death	11897415	M	94	N		58	3VD	B2	N	Excentric	none	N	Y	6	Y	tubular	10.4	0.72	2.5	2	none	1.7	Nagomi	2.5	18	RCA					N	Rt.TFI	N	Y		N	竹内 剛	Y	13	55	#4PD	N	none	0	48
N	Y	284	N	N	72339124	M	80	N		38	2VD	B1	N	Excentric	none	N	Y	6	Y	discrete	8.01	1.37	3.0	2.5	none	2.2	Nagomi	2.5	28	LAD					N	Rt.TRI	N	Y		N	只野 雄飛	Y	8	38	#7	N	none	0	80
N	Y	270	N	N	72348664	F	73	N		61	1VD	C	N	Excentric	moderate	Y	Y	6	Y	diffuse	20.64	1.16	2.5	2.5	moderate	2.97	Nagomi	2.5	28	LCX					N	Rt.TRI	N	Y		N	金子 海彦	Y	29	9	#13	Y	moderate	0	112
N	Y	254	N	N	70488547	M	73	N		53	2VD	B2	N	Concentric	moderate	N	Y	6	Y	tubular	12.74	0.66		2.5	none	1.41	Nagomi	2.5	33	LAD					N	Rt.TRI	N	N		N	金子 海彦	Y	14	9	#8	N	none	0	217
N	Y	237	N	N	72348244	F	89	N		53	2VD	C	N	Excentric	moderate	Y	Y	6	Y	diffuse	16.02	0.91	3.0	2.5	none	1.93	Nagomi	2.5	44	LAD					N	Rt.TRI	N	Y	非Q波梗塞	Y	森田 祐介	Y	19	50	#7	Y	none	0	982
N	Y	382	N	N	72348392	M	79	N		37	1VD	C	N	Excentric	moderate	Y	Y	7	Y	diffuse	7.94	0.88		2.5	none	1.41	Nagomi	2.5	28	LAD					N	Rt.TRI	N	N		N	只野 雄飛	Y	7	16	#7	N	none	0	44
N	Y	208	N	N	72348322	M	63	N		80	2VD	B1	N	Excentric	none	N	Y	6	Y	discrete	9.16	0.51	2.75	2.25	none	2.51	Nagomi	2.25	21	LCX					N	Rt.TRI	N	Y		N	松名 伸記	Y	9	58	#15	N	none	0	58
N	Y	358	N	N	72348776	M	58	N		100	1VD	C	N	Concentric	none	N	Y	6	Y	diffuse		0		2.25	none		Nagomi	2.25	38	LAD					N	Rt.TRI	N	N		N	堀田 怜	Y	26	13	#9	N	none	0	507
N	Y	197	N	N	72348131	M	51	N			2VD	C	N	Excentric	moderate	Y	Y	6	Y	diffuse			3.0	2.5	none		Nagomi	2.5	50	LAD						Rt.TRI	N	Y		N	森田 祐介	Y	21	49	#7	Y	none	0	112
N	Y	382	N	N	72348835	F	84	N		70	2VD	C	N	Excentric	none	Y	Y	6	Y	diffuse	21.57	0.58	2.5	2.25	none	1.92	Nagomi	2.25	28	LCX					N	Rt.TRI	N	Y		N	松名 伸記	Y	15	25	#13	N	none	0	154
N	Y	367	N	N	72343217	M	67	N		69	2VD	B2	N	Excentric	none	N	Y	6	Y	tubular	5.52	0.42	2.25	2.25	none	1.37	Nagomi	2.5	50	LCX					N	Rt.TRI	N	Y		N	菅野 大太郎	Y	10	32	#12	N	none	0	75
N	Y	197	N	N	72348703	F	80	N		34	3VD	B2	N	Excentric	moderate	Y	N	6	Y	discrete	2.86	1.19	3.0	2.25	none	1.79	Nagomi	2.25	24	LAD					N	Rt.TRI	N	Y		N	菅野 大太郎	Y	21	19	#7	N	moderate	0	137
N	Y	36	N	N	70230322	M	56	N		58	2VD	B2	N	Excentric	none	N	Y	6	Y	tubular	13.26	0.69	3.0	2.25	none	1.56	Nagomi	2.25	28	RCA					N	Rt.TRI	N	Y		N	金子 海彦	Y	24	3	#4PD	N	none	0	970
N	Y	247	N	N	72348538	M	69	N		87	1VD	B2	N	Excentric	moderate	N	Y	7	Y	discrete	9.48	0.28		2	none	2.25	Nagomi	2.5	15	RCA					N	Lt.TFI	Y	N		N	八戸 大輔	Y	30	24	#3	N	none	0	122
N	Y	375	N	N	72348305	M	65	N		49	2VD	B2	N	Excentric	moderate	N	Y	7	Y	discrete	9.32	0.79	3.25	2.5	none	1.55	Nagomi	2.5	38	LAD					N	Rt.TFI	Y	Y		N	松名 伸記	Y	28	46	#6	N	none	0	92
N	Y	1	N	Cardiac Death	72348926	M	87	Y		62	3VD	C	N	Excentric	moderate	N	Y	6	Y	diffuse	18.6	0.67		2	none	1.77	Nagomi	2.25	38	LAD					Y	Rt.TRI	Y	N		N	菅野 大太郎	Y	67	30	#6	N	none	0
N	Y	264	N	N	71087032	F	76	N		64	3VD	C	N	Excentric	none	N	Y	6	Y	discrete	8.6	0.76	2.5	2.5	none	2.15	Nagomi	2.5	18	SVG					N	Rt.TRI	N	Y		N	辻本 誠長	Y	14	2		N	none	0	51
N	Y	336	N	N	72343217	M	67	N		27	3VD	B1	N	Excentric	none	N	Y	6	Y	discrete	3.84	1.22		2.5	none	1.66	Nagomi	2.5	18	LAD					N	Rt.TRI	N	N		N	藤田 勉	Y	7	58	#7	N	none	0
N	Y	184	N	N	72348807	M	69	N		68	2VD	C	N	Excentric	moderate	Y	Y	6	Y	diffuse	7.48	0.72	3.0	2.5	none	2.22	Nagomi	2.5	28	LAD					N	Rt.TRI	N	Y		N	松名 伸記	Y	32	29	#7	Y	moderate	0	47
Y	Y	309	N	N	72349041	M	73	N		100	1VD	C	N	Excentric	none	Y	Y	6	Y	diffuse		0	3.5	2.5	none		Nagomi	2.5	44	LAD					Y	Rt.TRI	N	Y		N	渡邊 智彦	Y	38	55	#6	N	none	1	4439
N	Y	330	N	N	72348932	F	86	N		56	1VD	B1	N	Excentric	none	N	Y	6	Y	discrete	11	1.06	3.0	2.5	none	2.41	Nagomi	2.5	21	LCX					N	Rt.TRI	N	Y		N	松名 伸記	Y	11	46	#12	N	none	0	82
N	Y	275	N	N	72348986	F	71	N		66	1VD	B2	N	Excentric	moderate	Y	Y	6	Y	tubular	13.2	0.52		2.25	none	1.55	Nagomi	2.5	21	LAD					N	Rt.TRI	N	N		N	森田 祐介	Y	11	28	#7	N	none	0	197
N	Y	333	N	N	72348344	M	65	N		99	1VD	C	N	Excentric	none	N	Y	7	Y	diffuse				2.5	none		Nagomi	2.5	50	RCA					N	Rt.TRI	N	N		N	菅野 大太郎	Y	33	11	#2	N	none	0	28
N	Y	203	N	N	72348122	M	76	N		75	3VD	B2	N	Excentric	none	N	Y	6	Y	tubular	19.35	0.55	3.0	2.25	none	2.19	Nagomi	2.5	24	LCX					N	Rt.TRI	N	Y		N	杉江 多久郎	Y	6	25	#13	N	none	0	123
	N	0			72348833	F	89			78	1VD	C	N	Excentric	none	N	Y	6	Y	diffuse	26.36	0.31		2.25	none	1.43	Nagomi	2.25	33	LAD					N	Rt.TRI	N	N		N	森田 祐介	Y	35	20	#7	N	none	0	77
	N	0			72348336	M	73			70	2VD	B1	N	Excentric	none	N	Y	6	Y	discrete	8.71	0.48	2.5	2	none	1.6	Nagomi	2.5	44	LCX					N	Rt.TFI	N	Y		N	金子 海彦	Y	18	0	#13	N	none	0	77
N	Y	309	N	N	72346409	M	80	N		66	3VD	B2	N	Excentric	none	Y	Y	6	Y	tubular	17.56	0.8		2.5	none	2.31	Nagomi	2.5	24	LCX					N	Rt.TRI	N	N		N	森田 祐介	Y	11	2	#13	N	none	0	150
Y	Y	203	N	N	72348011	F	79	N		38	3VD	B2	N	Excentric	none	N	Y	6	Y	tubular	16.64	1.35	3.0	2.5	moderate	2.18	Nagomi	2.5	44	LCX					N	Rt.TRI	N	Y		N	渡邊 智彦	Y	9	59	#13	N	moderate	0	62
N	Y	349	N	N	71936790	M	79	N		77	2VD	B2	N	Excentric	none	N	Y	6	Y	tubular	10.45	0.55		2.5	none	2.46	Nagomi	2.5	18	LCX					N	Rt.TFI	N	N		N	菅野 大太郎	Y	5	25	#15	N	none	0	206
Y	Y	239	N	N	72349051	M	72	N			2VD	C	N	Excentric	none	N	Y	6	Y	diffuse			3.0	2.5	none		Nagomi	2.5	50	RCA					N	Rt.TRI	N	Y		N	竹内 剛	Y	22	45	#2	N	none	0	56
N	Y	244	N	N	70238972	M	60	N		85	2VD	B1	N	Excentric	none	N	N	6	Y	tubular	8.33	0.24	2.25	2.25	none	1.66	Nagomi	2.25	24	LCX					N	Rt.TRI	N	Y		N	鹿島 由史	Y	12	11	#13	N	none	0	94
N	Y	319	N	N	72348964	M	61	N		53	2VD	C	N	Excentric	moderate	N	Y	6	Y	diffuse	21.73	0.98	3.0	2.5	none	2.09	Nagomi	2.25	38	LAD					N	Rt.TRI	N	Y		N	菅野 大太郎	Y	22	7	#7	N	none	0	66
N	Y	243	N	N	72348467	F	70	N		57	3VD	C	N	Excentric	moderate	Y	Y	6	Y	diffuse	19.38	0.71	3.0	2.5	none	1.68	Nagomi	2.5	38	LAD					N	Rt.TRI	N	Y		N	鹿島 由史	Y	25	17	#6	Y	moderate	0	24
N	Y	225	N	N	72349225	M	75	N		53	2VD	B2	N	Excentric	none	Y	Y	6	Y	tubular	10.76	0.85	2.5	2.5	none	1.81	Nagomi	2.5	28	LAD					N	Rt.TRI	N	Y		N	渡邊 智彦	Y	17	48	#7	N	none	0	99
N	Y	217	N	N	72347613	M	69	N		81	3VD	C	N	Excentric	none		Y	8	Y	diffuse	22.49	0.41	3.0	2.25	none	2.14	Nagomi	2.5	33	LCX					N	Rt.TFI	N	Y		N	菅野 大太郎	Y	37	2	#14	N	none	0	10
N	Y	284	N	N	72348719	M	74	N		64	2VD	C	N	Excentric	none	N	Y	6	Y	diffuse	26.66	0.67		2	none	1.84	Nagomi	2.25	38	LCX					N	Rt.TRI	N	N		N	辻本 誠長	Y	32	24	#15	N	none	0	60
N	Y	197	N	N	72349225	F	75	N		55	2VD	B2	N	Excentric	none	N	Y	6	Y	tubular	18.37	0.81	2.75	2.25	none	1.79	Nagomi	2.25	33	LCX					N	Rt.TRI	N	Y		N	金子 海彦	Y	8	32	#13	N	none	0
N	Y	340	N	N	72349226	M	37	N		69	2VD	B1	N	Excentric	none	N	Y	6	Y	discrete	12.9	0.72		2.5	none	2.25	Nagomi	2.5	21	RCA					N	Rt.TRI	N	N		N	只野 雄飛	Y	10	29	#4PD	N	none	0	109
N	Y	341	N	N	72349285	F	77	N		100	1VD	B2	N	Excentric	none	N	Y	6	Y	tubular		0	3.0	2.5	none		Nagomi	2.5	24	LCX					Y	Rt.TRI	N	Y		N	森田 祐介	Y	9	9	#14	N	none	0	501
N	Y	336	N	N	72349226	M	37	N		68	2VD	B2	N	Excentric	none	N	Y	6	Y	tubular	10.36	0.59		2.5	none	1.85	Nagomi	2.5	24	LCX					N	Rt.TRI	Y	N		N	只野 雄飛	Y	6	6	#14	N	none	0
N	Y	234	N	N	72349301	F	63	N		58	1VD	C	N	Excentric	moderate	Y	Y	6	Y	diffuse	14.61	0.87	3.0	2.5	none	2.06	Nagomi	2.5	50	LAD					N	Rt.TRI	N	Y		N	森田 祐介	Y	22	32	#7	Y	none	0	173
N	Y	354	N	N	72349331	F	57	N		72	1VD	B2	N	Excentric	none	N	Y	6	Y	tubular	14.72	0.53		2.25	none	1.93	Nagomi	2.25	24	RCA					N	Rt.TRI	N	N		N	只野 雄飛	Y	6	19	#4PD	N	none	0	77
Y	Y	204	N	N	72349051	M	72	N		68	2VD	B2	N	Excentric	none	N	Y	6	Y	tubular	12.14	0.63		2.5	none	1.94	Nagomi	2.5	28	LAD					N	Rt.TRI	N	N		N	杉江 多久郎	Y	18	23	#6	Y	none	0	177
	N	0			72342998	M	63			71	2VD	C	N	Excentric	severe	N	Y	6	Y	diffuse	15.23	0.77	2.75	2.5	none	2.68	Nagomi	2.5	38	LAD					N	Rt.TFI	N	Y	Q波梗塞 / 非Q波梗塞	Y	鹿島 由史	Y	31	13	#6	Y	none	0	1470
N	Y	327	N	N	72349394	M	47	N		100	1VD	B2	N	Excentric	none	N	Y	6	Y	tubular		0	3.0	2.5	none		Nagomi	2.5	18	RCA					Y	Rt.TRI	N	Y		N	堀田 怜	Y	32	55	#1	N	none	0	437
N	Y	232	N	N	11262692	M	73	N		58	2VD	B2	N	Excentric	none	Y	Y	6	Y	tubular	12.65	0.75		2.5	none	1.77	Nagomi	2.5	38	LAD					N	Rt.TRI	N	N		N	鹿島 由史	Y	16	8	#7	N	none	0	61
N	Y	183	N	N	72348131	M	51	N		56	2VD	B1	N	Excentric	none	N	Y	6	Y	discrete	4.95	0.74	2.5	2.5	none	1.67	Nagomi	2.25	18	LCX					N	Rt.TRI	N	Y		N	森田 祐介	Y	7	25	#13	N	none	0	99
N	Y	306	N	N	72340120	M	71	N		62	1VD	B2	N	Excentric	none	N	Y	6	Y	discrete	5.15	0.65		2	moderate	1.71	Nagomi	2.25	15	LAD					N	Rt.TRI	N	N		N	鹿島 由史	Y	7	24	#10	N	none	0	88
N	Y	211	N	N	72348853	M	86	N		100	2VD	C	Y	Concentric	none	N	Y	7	Y	diffuse		0		2.5	none		Nagomi	2.5	50	LAD					N	Rt.TFI	N	N		N	杉江 多久郎	Y	53	20	#7	N	none	0	54
N	Y	319	N	N	72349329	F	85	N		69	2VD	B2	N	Excentric	severe	N	Y	6	Y	tubular	8.2	0.53	2.25	2.25	none	1.72	Nagomi	2.25	28	LCX					N	Rt.TFI	Y	Y	冠動脈解離	Y	森田 祐介	Y	82	48	#13	N	none	0	65
N	Y	174	N	N	72348577	M	71	N		79	2VD	B2	N	Excentric	none	Y	Y	6	Y	discrete	6.23	0.47	3.5	2.5	none	2.2	Nagomi	2.5	50	LCX					N	Rt.TRI	N	Y		N	渡邊 智彦	Y	13	53	#13	N	moderate	0	95
N	Y	318	N	N	72349479	M	76	N		66	1VD	B1	N	Excentric	none	N	Y	6	Y	discrete	5.81	0.65	3.0	2.5	none	1.93	Nagomi	2.5	12	LAD					N	Rt.TRI	N	Y		N	鹿島 由史	Y	11	43	#9	N	none	0	72
N	Y	338	N	N	71552310	F	77	N		71	2VD	B1	N	Excentric	none	N	Y	6	Y	discrete	9.51	0.5	2.75	2.25	none	1.71	Nagomi	2.25	21	LCX					N	Rt.TRI	N	Y		N	金子 海彦	Y	14	31	#11	N	none	0	42
Y	Y	281	N	N	71882300	F	78	N		60	1VD	B1	N	Excentric	none	N	Y	6	Y	discrete	8	1.02		2.5	none	2.54	Nagomi	2.5	18	RCA					N	Rt.TRI	Y	N		N	金子 海彦	Y	17	23	#4PD	N	none	0	204
N	Y	217	N	N	72348127	M	88	N	N	70	3VD	C	N	Excentric	none	N	Y	6	Y	diffuse	24.45	0.67	2.5	2.5	none	2.23	Nagomi	2.5	33	LCX					N	Rt.TRI	N	Y		N	辻本 誠長	Y	20	0	#14	N	none	0	124
N	Y	242	N	N	72349422	F	74	N		63	3VD	B2	N	Excentric	none	N	Y	6	Y	tubular	5.82	0.73	2.5	2.25	none	1.97	Nagomi	2.25	33	LCX					N	Rt.TFI	Y	Y		N	藤田 勉	Y	23	29	#12	N	none	0	82
N	Y	231	N	N	72349591	M	74	N		76	1VD	B2	N	Excentric	none	N	Y	6	Y	tubular	11.03	0.49	2.25	2.25	none	2	Nagomi	2.5	18	LCX					N	Rt.TFI	N	Y		N	堀田 怜	Y	11	48	#12	N	moderate	0	20
N	Y	340	N	N	72349594	M	64	N		69	1VD	C	N	Excentric	none	Y	Y	6	Y	diffuse	11.94	0.47	3.5	2.5	none	1.53	Nagomi	2.5	33	LAD					N	Rt.TRI	N	Y		N	森田 祐介	Y	17	56	#7	N	none	0	103
N	Y	203	N	N	72348467	F	70	N		55	3VD	C	N	Excentric	none	N	Y	6	Y	diffuse	19.93	1.05	2.75	2.5	none	2.33	Nagomi	2.5	50	RCA					N	Lt.TRI	N	Y		N	松名 伸記	Y	17	37	#2	N	none	0	54
N	Y	227	N	N	72341011	M	69	N		66	3VD	B2	N	Excentric	none	N	Y	6	Y	tubular	14	0.74	2.5	2.5	none	2.17	Nagomi	2.5	18	LCX					N	Rt.TRI	N	Y		N	八戸 大輔	Y	5	2	#13	N	none	0	194
N	Y	331	N	N	70620835	M	70	N		73	1VD	B2	N	Excentric	none	N	Y	6	Y	tubular	15.64	0.55	3.0	2.25	none	2.03	Nagomi	2.25	24	LCX					N	Rt.TRI	N	Y		N	堀田 怜	Y	12	37	#15	N	none	0	40
N	Y	203	N	N	72342362	M	56	N		76	1VD	B2	N	Excentric	none	Y	Y	6	Y	diffuse	11.65	0.39	3.0	2.5	none	1.65	Nagomi	2.5	38	LCX					N	Lt.TRI	N	Y		N	堀田 怜	Y	17	47	#12	N	none	0	229
N	Y	273	N	N	72349011	M	69	N		62	2VD	B2	N	Concentric	none	Y	Y	6	Y	tubular	16.5	0.76	2.5	2.5	none	1.99	Nagomi	2.5	28	LAD					N	Lt.TRI	N	Y		N	只野 雄飛	Y	9	9	#7	N	moderate	1	64
N	Y	264	N	N	70239896	M	51	N		63	1VD	C	N	Excentric	moderate	Y	Y	6	Y	diffuse	26.53	0.83	3.0	2.25	none	2.23	Nagomi	2.5	38	LAD					N	Rt.TRI	N	Y		N	藤田 勉	Y	12	27	#7	N	none	0	60
N	Y	203	N	N	72349753	M	79	N		45	1VD	C	N	Excentric	none	N	Y	6	Y	diffuse	7.31	0.96	3.0	2.5	none	1.75	Nagomi	2.5	33	LAD					N	Rt.TRI	N	N		N	小林 健	Y	29	54	#7	N	moderate	0	58
N	Y	115	N	N	72349689	M	90	N		47	1VD	B2	N	Excentric	none	N	Y	6	Y	diffuse	6.57	0.79	3.0	2.5	none	1.49	Nagomi	2.5	33	LAD					N	Rt.TRI	N	Y		N	杉江 多久郎	Y	8	49	#7	N	none	0	264
N	Y	323	N	N	72348670	M	75	N		63	3VD	B2	N	Excentric	none	N	Y	6	Y	tubular	13.84	0.55		2	none	1.49	Nagomi	2.25	28	LAD					N	Rt.TRI	N	N		N	八戸 大輔	Y	19	54	#8	N	none	0	152
N	Y	331	N	N	72349165	M	80	N		100	1VD	B2	N	Excentric	severe	N	Y	6	Y	tubular		0		2	moderate		Nagomi	2.5	24	LAD					N	Rt.TFI	Y	N		N	菅野 大太郎	Y	43	50	#7	N	moderate	0	2115
N	Y	165	N	N	72349805	M	63	N		67	2VD	C	N	Concentric	none	N	Y	6	Y	discrete	8.39	0.65	2.5	2.25	severe	1.98	Nagomi	2.5	18	LCX					N	Rt.TRI	N	Y		N	金子 海彦	Y	9	51	#12	N	none	0	50
N	Y	189	N	N	70326634	M	82	N			1VD	B1	N	Excentric	none	N	Y	6	Y	discrete				2.25	none		Nagomi	2.25	15	RCA					N	Rt.TRI	N	N		N	安田 優	Y	12	5	#4AV	N	none	0
N	Y	297	N	N	72348900	M	62	N		46	3VD	B1	N	Excentric	none	N	Y	6	Y	discrete	6.62	0.66		2	none	1.24	Nagomi	2.25	38	LCX					N	Rt.TRI	N	N		N	安田 優	Y	8	33	#12	N	none	0	31
Y	Y	136	N	N	72348992	M	85	N		53	3VD	C	N	Excentric	moderate	N	Y	6	Y	diffuse	16.47	0.68	2.75	2.25	none	1.46	Nagomi	2.5	38	RCA					N	Rt.TRI	Y	Y		N	杉江 多久郎	Y	68	3	#2	Y	none	0	109
N	Y	175	N	N	72349017	M	93	N		100	2VD	C	Y	Excentric	moderate	Y	Y	6	Y	diffuse		0	3.0	2.5	none		Nagomi	2.5	38	LAD					N	Rt.TRI	N	Y		N	杉江 多久郎	Y	141	30	#7	Y	none	0	974
N	Y	242	N	Cardiac Death	11559301	F	93	N		47	2VD	B1	N	Excentric	none	N	Y	6	Y	discrete	5.37	1.06		2.5	none	1.99	Nagomi	2.5	21	LAD					N	Rt.TFI	Y	N		N	松名 伸記	Y	26	1	#8	N	none	0	192
N	Y	193	N	N	70802325	F	76	N		74	3VD	B2	N	Excentric	none	N	Y	6	Y	tubular	18.1	0.49		2.25	none	1.93	Nagomi	2.25	24	RCA					N	Rt.TFI	N	N		N	安田 優	Y	25	24	#3	N	none	0	167
N	Y	291	N	N	72344872	M	74	N		65	3VD	C	N	Excentric	none	N	Y	6	Y	diffuse	21.7	0.81	2.25	2.25	none	2.28	Nagomi	2.25	28	LCX					N	Rt.TRI	N	Y		N	大竹 諒	Y	18	36	#13	N	none	0	121
Y	Y	113	N	N	72350203	M	57	N		52	1VD	B2	N	Excentric	none	N	Y	6	Y	tubular	11	1.27	3.0	2.5	none	2.65	Nagomi	2.5	15	LCX					N	Rt.TRI	N	Y		N	内藤 薫	Y	18	13	#13	N	none	0	92
N	Y	196	N	N	72350253	M	47	N		69	1VD	B2	N	Excentric	none	Y	Y	6	Y	tubular	10.05	0.58	3.25	2.5	none	1.9	Nagomi	2.5	38	LAD					N	Rt.TRI	N	Y		N	松名 伸記	Y	31	48	#7	N	moderate	1	67
N	Y	245	N	N	71981660	M	79	N		49	1VD	C	N	Concentric	moderate	Y	Y	6	Y	diffuse	23.11	1.16	2.5	2.5	none	2.26	Nagomi	2.5	38	LAD					N	Rt.TRI	N	Y		N	大竹 諒	Y	18	56	#7	N	none	0
N	Y	265	N	N	72350111	M	48	N		52	1VD	B1	N	Excentric	none	N	Y	6	Y	discrete	8.55	1.02		2.25	none	2.13	Nagomi	2.5	21	LCX					N	Rt.TRI	N	N		N	藤田 勉	Y	6	25	#13	N	none	0	133
N	Y	177	N	N	72350051	M	73	N		62	1VD	B1	N	Excentric	none	N	Y	6	Y	discrete	7.56	0.74		2.25	none	1.92	Nagomi	2.25	15	LAD					N	Rt.TRI	N	N		N	内藤 薫	Y	11	33	#8	N	none	0	77
N	Y	243	N	N	72350256	M	81	N		79	1VD	B2	N	Excentric	none	N	Y	6	Y	tubular	11.85	0.41	2.5	2.5	none	1.9	Nagomi	2.25	28	LAD					N	Rt.TRI	N	Y		N	大竹 諒	Y	18	51	#9	N	none	0	106
N	Y	299	N	N	72346972	M	73	N		47	2VD	B1	N	Excentric	none	N	Y	6	Y	discrete	5.37	1.06	2.75	2.75	none	1.99	Nagomi	2.25	38	LCX					N	Rt.TRI	N	Y		N	安田 優	Y	27	15	#13	N	none	0	172
	N	0			72350120	M	87			72	2VD	B2	N	Excentric	moderate	N	Y	6	Y	tubular	11.36	0.55		2.5	none	1.93	Nagomi	2.5	18	LAD					N	Rt.TRI	Y	N		N	只野 雄飛	Y	9	24	#7	N	none	0	50
	N	0			72350440	M	85			52	2VD	B1	N	Excentric	none	N	Y	6	Y	discrete	5.78	0.91		2.5	none	1.89	Nagomi	2.5	18	LCX					N	Lt.TRI	Y	N		N	堀田 怜	Y	10	13	#11	N	none	0	141
N	Y	104	N	Non-Cardiac Death	72345049	F	86	N		78	1VD	C	N	Concentric	none	N	Y	6	Y	tubular	12.74	0.41		2.25	severe	1.83	Nagomi	2.5	24	LAD					N	Lt.TRI	N	N		N	大竹 諒	Y	17	9	#7	N	severe	0	446
	N	0			72350363	M	81			99	1VD	C	N	Excentric	none	N	Y	6	Y	diffuse			3.25	2.5	none		Nagomi	2.5	50	RCA					N	Rt.TRI	N	Y		N	Diaz	Y	25	3	#3	N	none	0	218
N	Y	55	N	N	72350503	F	80	N		56	2VD	B2	N	Excentric	none	Y	Y	6	Y	tubular	11.07	0.99	2.75	2.5	none	2.28	Nagomi	2.5	21	LAD					N	Rt.TRI	N	Y		N	藤田 勉	Y	23	6	#7	N	moderate	0	175
N	Y	36	N	N	72350385	F	92	N		58	1VD	B2	N	Excentric	moderate	N	Y	6	Y	tubular	18.81	0.89	3.5	2.5	none	2.12	Nagomi	2.5	38	LAD					N	Rt.TRI	N	Y		N	由井 寿典	Y	28	6	#6	Y	none	0	56
N	Y	207	N	N	72350470	F	59	N			3VD	B2	N	Excentric	none	N	Y	6	Y	tubular				2.5	none		Nagomi	2.5	38	LAD					N	Lt.TRI	N	N		N	由井 寿典	Y	14	51	#7	N	none	0	252
N	Y	173	N	N	72350479	M	77	N		52	1VD	B2	N	Excentric	none	Y	Y	6	Y	tubular	12.05	1.21	2.5	2.5	none	2.51	Nagomi	2.5	28	LAD					N	Rt.TRI	N	Y	冠動脈破裂 / 穿孔	Y	藤田 勉	Y	37	10	#7	Y	none	1	53
N	Y	106	N	N	71667203	M	82		N	70	2VD	B1	N	Excentric	none	N	Y	6	Y	discrete	8.6	0.61	2.25	2.25	none	2.02	Tansei	2.25	21	LCX					N	Rt.TRI	N	Y		N	士反 英昌	Y	8	32	#13	N	none	0	96
N	Y	1384	N	N	71661325	F	63	N		97	2VD	B2	N	Excentric	none	N	Y	6	Y	tubular	10.75	0.06		2.5	none	1.65	Tansei	2.5	24	RCA					N	Rt.TRI	N	Y		N	杉江 多久郎	Y	10	47	#3	N	none	0	111
Y	Y	1161	N	N	12806828	M	88	N	N	73	1VD	B2	N	Excentric	moderate	Y	Y	7	Y	tubular	18.57	0.87		2.25	none	3.26	Tansei	2.5	33	LAD					N	Rt.TFI	Y	N		N	士反 英昌	Y	72	5	#6	N	moderate	0	153
Y	Y	1150	N	N	71654176	F	80	N	N	69	2VD	B1	N	Concentric	none	N	Y	6	Y	tubular	18.63	0.67	2.25	2.25	none	2.12	Tansei	2.25	28	LCX					N	Rt.TRI	N	Y		N	金子 海彦	Y	14	34	#13	N	none	0	98
N	Y	901	N	N	70406954	M	72	N	N	71	2VD	B2	N	Excentric	none	N	Y	6	Y	tubular	4.2	0.28	3.5	2.5	none	0.96	Tansei	2.5	28	LCX					N	Rt.TRI	N	Y		N	松名 伸記	Y	37	10	#11	N	none	0	81
	N	0			71670894	M	83			86	1VD	B1	N	Excentric	none	N	Y	6	Y	discrete	3.52	0.23	2.25	2.25	none	1.66	Tansei	2.25	9	RCA					N	Rt.TRI	N	Y		N	鹿島 由史	Y	13	25	#4AV	N	none	0	70
Y	Y	1150	N	N	71660874	M	49	N	N	99	3VD	C	N	Excentric	none	Y	Y	6	Y	diffuse			3.5	2.25	none		Tansei	2.5	18	LCX					N	Rt.TRI	N	Y		N	鹿島 由史	Y	44	41	#11	N	none	0	98
	N	0			71667674	M	73			60	1VD	B2	N	Concentric	moderate	N	Y	6	Y	tubular	17.41	1.14	2.5	2.5	none	2.82	Tansei	2.5	28	RCA					N	Lt.TRI	N	Y		N	杉江 多久郎	Y	16	7	#2	N	moderate	0	75
Y	Y	1168	N	N	71644806	M	57	N	N	63	2VD	B2	N	Excentric	none	Y	Y	6	Y	tubular	13.41	0.96	3.5	2.5	none	2.61	Tansei	2.5	24	RCA					N	Rt.TFI	N	Y		N	松名 伸記	Y	51	9	#4PD	N	moderate	1	61
	N	0			71646632	M	79			72	3VD	B2	N	Excentric	none	N	Y	6	Y	tubular	13.25	0.53	2.25	2.25	none	1.92	Tansei	2.5	24	LAD					N	Rt.TRI	N	Y		N	菅野 大太郎	Y	5	9	#8	N	none	0	61
N	Y	1105	N	N	70124684	M	79	N	N	64	1VD	B2	N	Excentric	none	Y	Y	6	Y	tubular	12.04	0.96	2.5	2.5	none	2.65	Tansei	2.5	38	LCX					N	Lt.TRI	N	Y		N	渡邊 智彦	Y	23	53	#14	N	none	1	147
	N	0			11998862	M	84			63	1VD	B2	N	Concentric	severe	N	Y	6	Y	tubular	12.08	0.94	2.5	2.5	none	2.53	Tansei	2.5	18	LAD					N	Rt.TRI	N	Y		N	八戸 大輔	Y	14	54	#6	N	none	0	234
	N	0			71269494	M	75			67	2VD	C	N	Excentric	none	N	Y	6	Y	diffuse	5.48	0.59	2.5	2.25	moderate	1.76	Tansei	2.25	38	LAD					N	Rt.TRI	N	Y		N	只野 雄飛	Y	15	11	#9	N	moderate	0	210
N	Y	197	N	N	71661480	F	75	N	N	75	2VD	C	N	Excentric	moderate	Y	Y	6	Y	diffuse	18.48	0.46	2.5	2.5	none	1.83	Tansei	2.5	38	LAD					N	Rt.TRI	N	Y		N	只野 雄飛	Y	8	27	#7	N	moderate	0	490
N	Y	515	N	N	71670179	M	68	N	N	79	1VD	B2	N	Concentric	none	Y	Y	6	Y	tubular	19.04	0.6	2.5	2.5	none	2.84	Tansei	2.5	28	LAD					N	Lt.TFI	N	Y		N	原口 拓也	Y	27	2	#6	N	none	1	53
N	Y	213	N	N	71670308	F	90	N	N	83	2VD	C	N	Excentric	moderate	N	Y	6	Y	diffuse	18.83	0.35	2.5	2.5	none	2.09	Tansei	2.5	28	LCX					N	Lt.TRI	N	Y		N	士反 英昌	Y	6	55	#14	N	none	0	179
Y	Y	681	N	N	11350701	F	92	N	N	84	2VD	B2	N	Excentric	none	Y	Y	6	Y	tubular	19.34	0.33	2.5	2.5	none	2.04	Tansei	2.5	38	LAD					N	Lt.TBI	N	Y		N	士反 英昌	Y	34	57	#7	N	none	0	74
Y	Y	895	N	N	71432348	F	71	N	N	71	2VD	B2	N	Concentric	none	Y	Y	6	Y	tubular	19.1	0.71	3.0	2.25	none	2.42	Tansei	2.25	24	RCA					N	Rt.TRI	N	Y		N	只野 雄飛	Y	12	33	#4AV	N	moderate	0	114
Y	Y	590	Y	N	71670818	M	80	Y	N	75	1VD	B2	N	Concentric	none	N	Y	6	Y	tubular	13.49	0.64	2.5	2.5	moderate	2.59	Tansei	2.5	24	LAD					N	Rt.TFI	N	Y		N	小林 健	Y	10	35	#7	N	none	0	85
N	Y	896	N	N	71573218	M	77	N	N	99	2VD	C	N	Concentric	none	Y	N	6	Y	diffuse			2.75	2	none		Tansei	2.25	33	LAD		Ultimaster Tansei	3.0	28	N	Rt.TRI	Y	Y		N	加藤 修	Y	37	58	#7	N	moderate	0	353
N	Y	8	N	Cardiac Death	71671869	F	94	Y		81	3VD	A	N	Concentric	none	N	Y	7	Y	discrete	5.3	0.41	2.5	2.5	none	2.13	Tansei	2.5	18	LAD					N	Lt.TBI	N	Y		N	金子 海彦	Y	49	13	#7	N	none	0	3122
Y	Y	1034	N	N	71574048	F	77	N	N	85	2VD	C	N	Excentric	none	Y	Y	6	Y	tubular	16.11	0.39	2.25	2.25	severe	2.62	Tansei	2.25	21	RCA					N	Lt.TRI	N	Y		N	原口 拓也	Y	16	18	#4AV	N	moderate	0	72
Y	Y	1154	N	N	70808186	M	85	N	N	89	2VD	B2	N	Excentric	none	N	Y	6	Y	discrete	9.66	0.27	3.0	2.5	moderate	2.45	Tansei	2.5	18	RCA					N	Lt.TRI	N	Y		N	金子 海彦	Y	8	1	#4PD	N	none	0	237
Y	Y	400	N	N	71652802	F	75	N	N	56	3VD	B2	N	Concentric	none	N	Y	6	Y	tubular	11.21	0.98	2.5	2.5	none	2.22	Tansei	2.5	21	LAD					N	Rt.TRI	N	Y		N	松名 伸記	Y	17	27	#7	N	moderate	0	58
	N	0			71653389	M	86			71	3VD	C	N	Excentric	severe	Y	Y	6	Y	diffuse	22.7	0.69	2.5	2.5	none	2.36	Tansei	2.5	28	LAD					N	Rt.TFI	N	Y		N	士反 英昌	Y	19	4	#7	N	moderate	1	383
Y	Y	824	N	N	71674021	M	71	N	N	100	1VD	B1	N	Excentric	none	N	Y	6	Y	discrete				2.5	none		Tansei	2.5	18	LAD					Y	Rt.TRI	N	N		N	原口 拓也	Y	14	53	#7	N	none	0	51
	N	0			71667205	F	89			74	1VD	C	N	Concentric	severe	Y	Y	6	Y	diffuse	7.79	0.48	3.0	2.25	none	1.85	Tansei	2.25	38	LAD					N	Rt.TFI	N	Y		N	菅野 大太郎	Y	19	4	#6	N	moderate	1	69
N	Y	112	N	N	11087485	M	93	N	N	75	2VD	B1	N	Concentric	none	N	Y	6	Y	discrete	8.16	0.55		2.25	none	2.16	Tansei	2.25	15	LCX					N	Rt.TRI	N	N		N	鹿島 由史	Y	8	58	#15	N	moderate	0	71
N	Y	529	N	N	71671791	F	96	N	N	83	3VD	C	N	Excentric	severe	N	Y	6	Y	diffuse	24.9	0.41	3.0	2.5	none	2.42	Tansei	2.5	38	RCA					N	Lt.TRI	N	Y		N	鹿島 由史	Y	20	40	#1	Y	moderate	0	153
Y	Y	1009	N	N	71644833	F	69	N	N	75	3VD	B1	N	Excentric	none	N	Y	6	Y	discrete	7.97	0.58		2.5	none	2.3	Tansei	2.5	15	LCX					N	Rt.TRI	N	N		N	鹿島 由史	Y	5	55	#11	N	none	0	54
Y	Y	1135	N	N	71647018	F	68	N		51	3VD	A	N	Concentric	none	N	Y	6	Y	discrete	8.94	1.26	2.5	2.5	none	2.57	Tansei	2.5	18	LCX					N	Rt.TRI	N	Y		N	菅野 大太郎	Y	13	51	#13	N	none	0	110
N	Y	1033	N	N	71674542	M	48	N	N	63	1VD	B2	N	Concentric	none	Y	Y	6	Y	tubular	11.19	0.97	2.5	2.5	none	2.63	Tansei	2.5	21	LAD					N	Rt.TRI	N	Y		N	金子 海彦	Y	25	46	#6	N	none	1	95
Y	Y	1002	N	N	71671708	F	84	N	N	66	1VD	B1	N	Excentric	none	N	Y	6	Y	discrete	9.86	0.73			none	2.16	Tansei	2.25	28	LCX					N	Rt.TRI	N		冠動脈解離	Y	只野 雄飛	Y	14	46	#13	N	none	0	96
Y	Y	1089	N	N	12290265	M	64	N	N	74	3VD	C	N	Excentric	none	Y	Y	6	Y	diffuse	21.95	0.66	2.5	2.5	none	2.53	Tansei	2.5	28	LCX					N	Lt.TRI	N	Y		N	杉江 多久郎	Y	29	14	#13	N	none	1	101
Y	Y	623	Y	N	70580256	F	74	Y	N	88	2VD	B2	N	Concentric	none	Y	Y	6	Y	discrete	7.1	0.33	2.5	2.25	none	2.83	Tansei	2.5	15	LCX	LCX				N	Rt.TRI	N	Y		N	鹿島 由史	Y	25	48	#11	N	moderate	1	151
N	Y	497	N	N	12942973	F	83	N	N	79	3VD	B2	N	Excentric	none	N	Y	6	Y	tubular	11.84	0.56	3.0	2.5	none	2.59	Tansei	2.5	18	LAD					N	Lt.TRI	N	Y		N	八戸 大輔	Y	8	5	#7	N	none	0	84
Y	Y	175	N	N	71110629	M	85	N	N	67	3VD	B2	N	Excentric	none	N	Y	6	Y	tubular	10.51	0.76	2.5	2.25	none	2.32	Tansei	2.25	18	RCA					N	Rt.TRI	N	Y		N	菅野 大太郎	Y	11	55	#4PD	N	none	0	47
Y	Y	831	N	N	71658292	M	81	N	N	80	2VD	B2	N	Concentric	none	N	Y	6	Y	discrete	8.09	0.5		2.25	none	2.5	Tansei	2.25	18	LAD					N	Rt.TRI	N	N		N	鹿島 由史	Y	9	57	#9	N	moderate	0	59
Y	Y	1009	N	N	71671295	M	71	N	N	61	1VD	B2	N	Excentric	none	N	Y	6	Y	tubular	14.69	1.02		2.25	severe	2.66	Tansei	2.5	18	RCA					N	Rt.TRI	N	N		N	小林 健	Y	10	46	#3	N	none	0	79
N	Y	1026	N	N	71271239	F	73	N	N	75	2VD	B2	N	Excentric	none	N	Y	6	Y	tubular	16.26	0.43		2.25	none	1.77	Tansei	2.25	18	LCX					N	Rt.TRI	N	N		N	鹿島 由史	Y	5	57	#13	N	none	0	84
Y	Y	1060	N	N	71668346	M	84	N	N	78	1VD	C	N	Concentric	none	Y	Y	7	Y	diffuse	22.15	0.5	3.0	2.5	none	2.31	Tansei	2.5	38	LAD					N	Lt.TFI	N	Y		N	鹿島 由史	Y	25	2	#6	N	moderate	0	124
Y	Y	242	N	N	71670908	M	66	N	N	64	2VD	C	N	Excentric	moderate	Y	Y	6	Y	tubular	12.9	1.09	3.5	2.5	none	3.04	Tansei	2.5	38	LAD					N	Rt.TRI	N	Y		N	八戸 大輔	Y	11	22	#6	N	severe	0	75
Y	Y	785	N	N	70454921	M	71	N	N	56	3VD	B2	N	Excentric	none	N	Y	6	Y	tubular	13.92	0.93	2.5	2.5	none	2.12	Tansei	2.5	38	LAD					N	Lt.TRI	N	Y		N	渡邊 智彦	Y	21	40	#7	N	none	0	77
N	Y	413	N	N	71665696	M	49	N	N	72	2VD	B2	N	Concentric	none	Y	Y	6	Y	tubular	17.98	0.69	4.0	2.5	none	2.5	Tansei	2.5	38	LCX					N	Rt.TRI	N	Y		N	鹿島 由史	Y	29	4	#15	Y	moderate	1	236
Y	Y	1169	N	N	71672522	F	65	N	N	80	2VD	B2	N	Concentric	none	N	Y	6	Y	tubular	10.29	0.48	2.5	2.5	none	2.36	Tansei	2.5	18	LCX					N	Rt.TRI	N	Y		N	杉江 多久郎	Y	15	24	#11	N	moderate	0	64
Y	Y	291	Y	N	12820952	M	59	Y	N	66	2VD	C	N	Excentric	none	N	Y	6	Y	diffuse	21.56	0.84	3.25	2.5	none	2.47	Tansei	2.5	28	LAD					N	Rt.TRI	N	Y		N	小林 健	Y	5	35	#7	N	none	0	371
N	Y	799	N	N	71663171	M	70	N	N	83	2VD	C	N	Excentric	moderate	Y	Y	8	Y	diffuse	24.86	0.35	3.0	2.5	none	1.98	Tansei	2.5	38	LAD					N	Rt.TFI	N	Y		N	杉江 多久郎	Y	38	10	#6	Y	moderate	0	65
N	Y	1224	N	N	71671655	M	72	N	N	73	1VD	C	N	Excentric	none	N	Y	6	Y	diffuse	21.45	0.55	2.5	2.25	none	2	Tansei	2.25	24	LCX					N	Rt.TRI	N	Y		N	菅野 大太郎	Y	14	32	#13	N	none	0	215
Y	Y	561	N	N	71701131	F	91	N	N	64	1VD	B2	N	Excentric	none	N	Y	6	Y	discrete	5.62	0.55	2.25	2.25	moderate	1.52	Tansei	2.25	18	LCX					N	Rt.TRI	N	Y		N	鹿島 由史	Y	8	53	#12	N	moderate	0	212
Y	Y	134	N	Cardiac Death	71701513	M	87		N	65	2VD	B2	N	Concentric	none	Y	Y	6	Y	tubular	6.13	0.67	2.25	2.25	none	1.92	Tansei	2.25	24	LCX					N	Rt.TRI		Y		N	鹿島 由史	Y	20	30	#14	N	none	0	80
N	Y	176	N	Non-Cardiac Death	71198923	F	89	N	N	75	2VD	B2	N	Concentric	none	Y	Y	6	Y	tubular	14.91	0.6		2.5	none	2.37	Tansei	2.5	28	LCX					N	Lt.TBI	N	N	冠動脈破裂 / 穿孔	Y	杉江 多久郎	Y	31	45	#12	N	none	0	159
N	Y	457	N	N	12576004	M	79	N	N	80	3VD	C	N	Concentric	none	Y	Y	6	Y	diffuse	25.83	0.44	2.25	2.25	none	2.18	Tansei	2.25	38	LCX					N	Rt.TRI	Y	Y		N	金子 海彦	Y	30	49	#14	N	moderate	0	71
Y	Y	387	Y	N	11626460	M	76	Y	N	60	3VD	B2	N	Excentric	none	Y	Y	6	Y	discrete	4.87	0.79	2.25	2.25	none	1.97	Tansei	2.25	28	LAD					N	Rt.TRI	N	Y		N	鹿島 由史	Y	13	11	#8	N	moderate	0	89
N	Y	1196	N	N	71701142	M	85	N	N	57	1VD	B1	N	Concentric	none	N	Y	6	Y	tubular	6.81	0.89	3.25	2.5	none	2.08	Tansei	2.5	33	LAD					N	Rt.TRI	N	Y		N	金子 海彦	Y	13	14	#7	N	none	0	91
N	Y	1224	N	N	11363232	F	79	N	N	71	1VD	B1	N	Excentric	none	N	Y	6	Y	discrete	7.56	0.65	2.25	2.25	none	2.23	Tansei	2.25	15	LCX					N	Lt.TRI	N	Y		N	鹿島 由史	Y	9	44	#14	N	none	0	77
N	Y	540	N	N	70491058	M	79	N	N	55	1VD	B2	N	Excentric	none	N	Y	6	Y	discrete	6.65	0.71		2.25	none	1.59	Tansei	2.25	18	LAD					N	Rt.TRI	N	N		N	鹿島 由史	Y	6	42	#8	N	moderate	0	93
N	Y	1225	N	N	71134039	M	70	N	N	61	1VD	B2	N	Excentric	none	N	Y	6	Y	tubular	6.75	0.94	2.5	2.5	none	2.43	Tansei	2.5	28	LAD					N	Rt.TRI	N	Y		N	鹿島 由史	Y	7	9	#7	N	none	0	105
N	Y	1191	N	N	71194839	F	77	N	N	69	2VD	B2	N	Concentric	none	Y	Y	6	Y	discrete	8.45	0.74	3.5	2.5	none	2.41	Tansei	2.5	18	LCX					N	Rt.TRI	N	Y		N	鹿島 由史	Y	16	9	#14	N	moderate	1	158
Y	Y	1051	N	N	71673904	M	70	N	N	65	1VD	C	N	Excentric	none	N	Y	6	Y	diffuse	10.58	0.62	2.5	2.5	none	1.8	Tansei	2.5	33	LCX					N	Rt.TRI	N	Y		N	松名 伸記	Y	33	25	#13	N	none	0	67
Y	Y	967	N	N	11353790	M	86	N	N	68	1VD	C	N	Excentric	none	N	Y	6	Y	diffuse	12.41	0.64		2.5	none	2.01	Tansei	2.5	38	LAD					N	Lt.TFI	N	N		N	杉江 多久郎	Y	17	22	#7	N	none	0	69
N	Y	1214	N	N	70406954	M	72	N	N	74	2VD	A	N	Concentric	none	N	Y	6	Y	discrete	8.53	0.55		2.5	none	2.13	Tansei	2.5	18	LAD					N	Rt.TRI	N	N		N	鹿島 由史	Y	3	38	#7	N	none	0	134
Y	Y	717	N	N	71673186	F	74	N	N	68	2VD	B2	N	Excentric	none	N	Y	6	Y	tubular	13.71	0.71		2.5	none	2.22	Tansei	2.5	28	LCX					N	Rt.TRI	N	N		N	鹿島 由史	Y	6	51	#12	N	none	0	162
N	Y	1212	N	N	70798150	M	65	N	N	85	3VD	B2	N	Excentric	none	Y	Y	6	Y	tubular	45.02	0.54	3.0	2.25	none	3.52	Tansei	2.25	18	RCA					N	Rt.TRI	N	Y		N	杉江 多久郎	Y	14	51	#4AV	N	none	1	158
N	Y	1136	N	N	11229054	M	68	N	N	75	1VD	C	N	Excentric	none	N	Y	6	Y	diffuse	22.69	0.69	3.0	2.25	none	2.73	Tansei	2.25	38	RCA					N	Rt.TFI	N	Y		N	小林 健	Y	43	28	#4AV	N	none	0	171
N	Y	749	N	N	71726929	M	52	N	N	71	1VD	A	N	Concentric	none	N	Y	6	Y	diffuse	8.49	0.58	2.5	2.25	none	2.01	Tansei	2.25	15	LCX					N	Rt.TRI	N	Y		N	鹿島 由史	Y	13	4	intermediate	N	none	0	104
N	N	0	N	N	71269494	M	75	N	N	88	2VD	C	N	Concentric	none	Y	Y	6	Y	diffuse	21.76	0.25	2.25	2.25	none	2.11	Tansei	2.25	33	LCX					N	Rt.TRI	N	Y		N	鹿島 由史	Y	17	27	#13	N	none	0	212
N	N	0	N	N	12905913	M	67	N	N	88	2VD	B2	N	Excentric	none	N	Y	6	Y	tubular	9.03	0.2	2.5	2.25	none	1.76	Tansei	2.25	28	LCX					N	Rt.TRI	N	Y		N	只野 雄飛	Y	8	45	#14	N	moderate	0	108
Y	Y	161	Y	N	70618903	M	70	Y	N	75	3VD	A	N	Concentric	none	N	Y	6	Y	discrete	9.61	0.48	2.25	2.25	none	1.92	Tansei	2.5	15	LAD					N	Rt.TRI	N	Y	冠動脈破裂 / 穿孔	Y	鹿島 由史	Y	15	11	#7	N	none	0	246
N	Y	1183	N	N	71665401	F	70	N	N	72	3VD	B1	N	Concentric	none	N	Y	6	Y	tubular	11.38	0.54	3.0	2.25	none	1.95	Tansei	2.25	24	LCX					N	Rt.TRI	N	Y		N	鹿島 由史	Y	14	21	#13	N	none	0	856
N	Y	186	N	N	71726703	M	49	N	N	67	2VD	B2	N	Excentric	none	Y	Y	6	Y	discrete	4.8	0.8	2.5	2.25	none	2.42	Tansei	2.25	15	LCX					N	Lt.TRI	N	Y		N	松名 伸記	Y	32	7	#14	N	none	0	100
Y	Y	239	N	N	71701283	F	88	N	N	59	3VD	B1	N	Concentric	none	N	Y	6	Y	tubular	18.35	0.89	3.0	2.5	none	2.16	Tansei	2.5	38	LAD					N	Rt.TRI	N	Y		N	松名 伸記	Y	49	56	#7	N	none	0	113
N	Y	1075	N	N	71671272	F	73	N	N	62	1VD	B1	N	Concentric	none	N	Y	6	Y	tubular	12.36	0.9	3.0	2.5	none	2.38	Tansei	2.5	18	LAD					N	Rt.TRI	N	Y		N	原口 拓也	Y	7	27	#7	N	none	0	80
N	Y	120	N	N	70466728	M	76	N	N	54	2VD	A	N	Concentric	none	N	Y	6	Y	discrete	4.08	1.01	2.5	2.5	none	2.2	Tansei	2.5	18	LCX					N	Rt.TFI	N	Y		N	杉江 多久郎	Y	12	28	#14	N	moderate	0	178
N	N	0	N	N	70801173	F	96	N	N	90	2VD	B2	N	Excentric	none	Y	Y	6	Y	tubular	16.24	0.21	3.0	2.25	none	2.21	Tansei	2.25	38	RCA					N	Rt.TRI	N	Y		N	松名 伸記	Y	21	42	#3	N	none	0	69
N	Y	1118	N	N	71701793	F	81	N	N	59	2VD	A	N	Concentric	none	N	Y	6	Y	discrete	8.66	0.6	2.25	2.25	none	1.37	Tansei	2.25	15	LCX					N	Rt.TRI	N	Y		N	鹿島 由史	Y	9	21	#14	N	none	0	90
N	Y	1211	N	N	71092051	F	77	N	N	61	3VD	B2	N	Excentric	none	N	Y	6	Y	tubular	9.95	0.73		2.25	moderate	1.86	Tansei	2.5	33	LCX					N	Rt.TRI	N	N		N	松名 伸記	Y	21	21	#14	N	moderate	0	85
Y	Y	1221	N	N	71726658	F	86	N	N	74	1VD	B1	N	Excentric	none	N	Y	6	Y	discrete	7.76	0.57	2.75	2	none	2.18	Tansei	2.25	24	LAD					N	Lt.TRI	N	Y		N	士反 英昌	Y	13	54	#7	N	none	0	40
N	Y	1186	N	N	71727933	M	69	N	N	83	3VD	B2	N	Excentric	none	Y	Y	6	Y	discrete	9.95	0.43	3.0	2.25	none	2.5	Tansei	2.5	18	LCX					N	Rt.TRI	N	Y		N	松名 伸記	Y	28	3	#13	N	none	0	81
N	Y	1130	N	N	71375919	M	81	N	N	51	1VD	C	N	Concentric	none	Y	Y	6	Y	diffuse	20.2	1.14	2.25	2.25	none	2.34	Tansei	2.25	38	LCX					N	Rt.TRI	N	Y		N	松名 伸記	Y	31	8	#13	N	moderate	1	54
N	Y	1199	N	N	71729114	M	63	N	N	79	1VD	B1	N	Concentric	none	N	Y	6	Y	tubular	17.52	0.46	3.0	2.25	none	2.19	Tansei	2.25	38	RCA					N	Rt.TRI	N	Y		N	松名 伸記	Y	29	18	#4PD	N	none	0	141
N	Y	1159	N	N	12845134	M	75	N	N	76	2VD	B2	N	Concentric	none	Y	Y	6	Y	tubular	11.81	0.58		2.5	none	2.41	Tansei	2.5	18	LAD					N	Lt.TRI	N	N		N	原口 拓也	Y	8	56	#7	N	moderate	0	101
Y	Y	941	N	N	70586165	M	78	N	N	65	3VD	B1	N	Excentric	none	N	Y	6	Y	discrete	7.16	0.73	2.25	2.25	none	2.08	Tansei	2.25	18	RCA					N	Rt.TRI	N	Y		N	小林 健	Y	9	12	#4PD	N	none	0	99
N	Y	1162	N	N	71727888	M	57	N	N	65	1VD	C	N	Excentric	none	Y	Y	6	Y	diffuse	7.8	0.72	3.0	2.25	none	2.06	Tansei	2.5	38	LAD					N	Rt.TRI	N	Y		N	八戸 大輔	Y	11	32	#7	N	moderate	0	123
N	N	0	N	N	71728114	M	53	N	N	58	1VD	B1	N	Excentric	none	N	Y	6	Y	discrete	6.27	0.71	2.5	2.25	none	1.69	Tansei	2.5	38	LAD					N	Rt.TRI	N	Y		N	小林 健	Y	12	3	#8	N	none	0	113
N	Y	581	N	N	71653349	M	60	N	N	65	2VD	C	N	Excentric	moderate	N	Y	6	Y	diffuse	6.1	0.58	2.0	2	none	1.63	Tansei	2.25	33	LCX		Ultimaster Tansei	2.25	15	N	Rt.TRI	Y	Y		N	鹿島 由史	Y	100	13	#14	Y	moderate	0	344
Y	Y	1149	N	N	71653111	M	54	N	N	100	1VD	C	Y	Concentric	none	Y	Y	8	Y	diffuse			3.5	2.5	none		Tansei	2.5	28	LCX					N	Rt.TFI	N	Y		N	鹿島 由史	Y	23		#14	N	none	0	448
Y	Y	1043	N	N	71729248	M	77	N	N	70	3VD	C	N	Concentric	none	Y	Y	6	Y	diffuse	7.51	0.5	3.0	2.5	none	1.65	Tansei	2.5	38	RCA					N	Rt.TRI	N	Y		N	藤田 勉	Y	18	55	#3	N	moderate	1	131
N	Y	1097	N	N	71727067	F	74	N	N	71	2VD	B2	N	Excentric	none	N	Y	6	Y	tubular	14.3	0.81	3.0	2.5	none	2.83	Tansei	2.5	24	LAD					N	Rt.TRI	N	Y		N	松名 伸記	Y	29	25	#7	N	moderate	0	294
Y	Y	306	Y	N	70123710	M	67	Y	N	72	2VD	B2	N	Excentric	none	Y	Y	6	Y	discrete	9.8	0.46	2.5	2.5	none	1.61	Tansei	2.5	18	LCX					N	Rt.TFI	N	Y		N	杉江 多久郎	Y	9	26	#14	N	none	0	68
N	Y	1046	N	N	71264486	M	69	N	N	66	1VD	B2	N	Concentric	none	Y	Y	6	Y	tubular	18.12	0.84	3.0	2.5	none	2.49	Tansei	2.5	33	LAD					N	Rt.TRI	N	Y		N	菅野 大太郎	Y	11	9	#7	N	none	1	53
Y	Y	1211	N	N	71727075	M	69	N	N	65	2VD	B2	N	Excentric	none	N	Y	6	Y	discrete	9.76	0.77	3.0	2.5	none	2.19	Tansei	2.5	24	LAD					N	Rt.TRI	N	Y		N	松名 伸記	Y	12	59	#7	N	moderate	0	56
N	Y	392	N	N	71665696	M	58	N	N	90	3VD	B2	N	Concentric	none	Y	Y	6	Y	tubular	14.75	0.2		2.25	none	2.09	Tansei	2.5	28	RCA					N	Rt.TRI	Y	N	Stent 脱落	Y	金子 海彦	Y	42	53	#4PD	N	none	0	226
N	Y	625	N	N	71170344	F	58	N	N	70	3VD	B2	N	Excentric	none	N	Y	6	Y	tubular	12.55	0.63		2.5	none	2.12	Tansei	2.5	28	RCA					N	Lt.TRI	Y	N		N	渡邊 智彦	Y	36	15	#4PD	N	none	0	123
N	Y	1158	N	N	71700678	M	80	N	N	84	2VD	B2	N	Concentric	none	N	Y	6	Y	tubular	16.95	0.35	2.25	2.25	none	2.14	Tansei	2.25	24	LCX					N	Lt.TRI	N	Y		N	松名 伸記	Y	33	54	#15	N	moderate	0	115
Y	Y	1184	N	N	11427468	M	61	N	N	71	3VD	C	N	Excentric	none	N	Y	6	Y	diffuse	3.88	0.5	4.0	2.5	none	1.76	Tansei	2.5	33	LAD					N	Rt.TRI	N	Y		N	杉江 多久郎	Y	22	50	#8	N	none	0	58
N	N	0	N	N	71731084	M	91	N	N	67	1VD	A	N	Concentric	none	N	Y	6	Y	discrete	4.93	0.75		2.5	none	2.27	Tansei	2.5	18	LCX					N	Rt.TRI	N	N		N	八戸 大輔	Y	8	37	intermediate	N	none	0	125
N	N	0	N	N	71666498	M	74	N	N	59	2VD	B2	N	Excentric	severe	N	Y	7	Y	discrete	7.39	0.81	3.5	2.5	none	1.95	Tansei	2.5	24	LMT					N	Rt.TFI	N	Y		N	杉江 多久郎	Y	34	20	#5	Y	none	0	55
Y	Y	357	N	N	71729350	F	76	N	N	75	1VD	B2	N	Concentric	none	Y	Y	6	Y	tubular	13.76	0.66	2.5	2.25	none	2.66	Tansei	2.25	24	RCA					N	Rt.TRI	N	Y		N	金子 海彦	Y	23	24	#4PD	N	none	1	129
N	Y	1128	N	N	71731139	F	80	N	N	82	3VD	B2	N	Concentric	none	Y	Y	6	Y	tubular	11.43	0.4	2.25	2.25	none	2.2	Tansei	2.25	18	LAD					N	Rt.TRI	N	Y		N	杉江 多久郎	Y	24	16	#7	N	none	0	132
Y	Y	1164	N	N	71726342	M	45	N	N	80	3VD	B2	N	Excentric	none	N	Y	6	Y	tubular	16.64	0.41	2.5	2	none	2.06	Tansei	2.25	28	RCA					N	Rt.TRI	N	Y		N	鹿島 由史	Y	18	9	#4AV	N	none	0	52
N	Y	491	N	Non-Cardiac Death	71729826	F	69	N	N	52	2VD	B2	N	Excentric	moderate	N	Y	6	Y	discrete	4.03	0.6	2.25	2.25	none	1.24	Tansei	2.25	24	RCA					N	Lt.TFI	Y	Y		N	藤田 勉	Y	86	16	#4PD	Y	none	0	48
N	Y	868	N	N	70488225	M	68	N	N	65	2VD	B1	N	Excentric	none	N	Y	6	Y	discrete	9.07	0.88		2.5	none	2.53	Tansei	2.5	12	RCA					N	Rt.TRI	N	N		N	鹿島 由史	Y	5	38	#4AV	N	none	0	152
N	Y	1160	N	N	71671792	F	73	N	N	65	1VD	C	N	Excentric	none	N	Y	6	Y	discrete	6.08	0.54	2.5	2.5	severe	1.52	Tansei	2.5	38	LAD					N	Rt.TRI	N	Y		N	原口 拓也	Y	8	16	#7	N	moderate	0	157
Y	Y	1202	N	N	71702268	M	79	N	N	60	1VD	B2	N	Excentric	none	Y	Y	6	Y	tubular	15.32	1.04	3.0	2.5	none	2.63	Tansei	2.5	21	LAD					N	Rt.TRI	N	Y		N	鹿島 由史	Y	26	2	#7	N	none	1	71
N	Y	1131	N	N	71726833	M	57	N	N	86	3VD	A	N	Concentric	none	N	Y	6	Y	discrete	6.42	0.19	2.25	2.25	none	1.35	Tansei	2.25	24	LCX					N	Rt.TRI	N	Y		N	菅野 大太郎	Y	11	48	#13	N	none	0	90
N	Y	926	N	N	71666593	M	71	N	N	60	3VD	C	N	Excentric	moderate	Y	Y	6	Y	diffuse	7.34	0.66	3.0	2.25	none	1.65	Tansei	2.25	38	LAD					N	Rt.TRI	N	Y		N	杉江 多久郎	Y	18	15	#7	N	none	0	126
Y	Y	640	N	N	71732857	M	62	N	N	99	3VD	B2	N	Excentric	none	Y	Y	6	Y	tubular			3.5	2	none		Tansei	2.5	24	LAD	LCX				N	Rt.TFI	N	Y		N	菅野 大太郎	Y	13	46	#7	N	none	0	102
N	N	79	N	N	71732384	M	88	N	N	62	2VD	B2	N	Excentric	moderate	Y	Y	6	Y	tubular	10.33	0.98	2.5	2.5	none	2.59	Tansei	2.5	24	RCA					N	Lt.TRI	N	Y		N	杉江 多久郎	Y	25	18	#3	N	none	1	263
Y	Y	197	Y	N	71659556	M	80	Y		70	2VD	C	N	Excentric	none	N	Y	6	Y	diffuse	13.5	0.49	2.25	2.25	none	1.65	Tansei	2.25	38	RCA					N	Rt.TRI	N	Y		N	只野 雄飛	Y	6	52	#4PD	N	none	0	66
N	Y	512	N	N	71671461	F	82	N	N	50	2VD	B2	N	Excentric	severe	Y	Y	6	Y	tubular	10.47	0.97	2.5	2.5	none	1.96	Tansei	2.5	28	LAD					N	Lt.TRI	N	Y		N	士反 英昌	Y	14	39	#7	N	none	1	79
Y	Y	1149	N	N	11081797	M	85	N	N	99	2VD	B2	N	Excentric	none	N	Y	6	Y	tubular			2.25		none		Tansei	2.25	38	LAD					N	Rt.TFI	N	Y		N	菅野 大太郎	Y	33	28	#9	N	none	0	104
Y	Y	1140	N	N	71733513	M	42	N	N	72	2VD	B2	N	Concentric	none	Y	Y	6	Y	discrete	9.58	0.57	3.0	2.25	none	2.05	Tansei	2.25	24	RCA					N	Rt.TRI	N	Y		N	只野 雄飛	Y	25	28	#4AV	N	none	0	434
	N	0			71198861	M	84			67	3VD	C	N	Concentric	moderate	N	Y	6	Y	diffuse	10.96	0.71	3.0	2.5	none	2.13	Tansei	2.5	38	LCX					N	Rt.TFI	N	Y		N	菅野 大太郎	Y	10	24	intermediate	N	none	0	187
N	Y	303	N	N	71729548	M	76	N	N	73	2VD	B2	N	Concentric	moderate	Y	Y	6	Y	tubular	16.12	0.68	3.5		none	2.51	Tansei	2.5	28	RCA					N	Rt.TRI	N	Y		N	金子 海彦	Y	24	28	#4AV	N	none	0	102
Y	Y	750	Y	N	71666380	M	37	Y	N	100	2VD	B1	Y	Concentric	none	Y	Y	8	Y	tubular			3.5	2	none		Tansei	2.5	28	LCX					N	Rt.TFI	N	Y		N	鹿島 由史	Y	92	29	#14	N	none	0	99
N	Y	1051	N	N	71730271	F	77	N	N	65	1VD	C	N	Excentric	none	N	Y	6	Y	diffuse	5.22	0.8		2.5	none	2.26	Tansei	2.5	33	RCA					N	Lt.TRI	N	N		N	鹿島 由史	Y	30		#4AV	N	moderate	0	153
Y	Y	888	N	N	11976904	M	95	N	N	70	3VD	B2	N	Concentric	none	Y	Y	6	Y	tubular	13.49	0.7	3.0	2.25	none	2.38	Tansei	2.25	18	RCA					N	Lt.TRI	N	Y		N	鹿島 由史	Y	9	0	#4AV	N	none	0	75
N	Y	970	N	N	71733049	M	82	N	N	74	2VD	B2	N	Excentric	none	N	Y	6	Y	tubular	13.94	0.6	2.5	2.25	none	2.28	Tansei	2.25	38	LCX					N	Rt.TRI	N	Y		N	松名 伸記	Y	14	22	#11	N	none	0	252
Y	Y	1197	N	N	70624351	M	63	N	N	64	2VD	B2	N	Excentric	none	N	Y	6	Y	tubular	11.92	0.94	2.5	2.5	none	2.64	Tansei	2.5	28	RCA					N	Rt.TRI	N	Y		N	松名 伸記	Y	30	51	#4AV	N	none	0	163
Y	Y	1312	N	N	70462306	F	73	N	N	60	3VD	A	N	Concentric	none	N	Y	6	Y	discrete	8.62	0.86	2.25	2.25	none	2.13	Tansei	2.25	15	LAD					N	Rt.TBI	N	Y	冠動脈解離	Y	杉江 多久郎	Y	25	34	#9	N	none	0	68
N	Y	379	N	N	71266934	M	76	N	N	62	3VD	B1	N	Excentric	none	N	Y	6	Y	discrete	8.16	0.65	3.0	2.25	none	1.73	Tansei	2.25	18	LITA					N	Lt.TRI	N	Y		N	金子 海彦	Y	28	57	LITA	N	none	0	81
	N	0			71732009	F	86			69	2VD	C	N	Excentric	none	Y	Y	6	Y	diffuse	14.32	0.66	4.0	2.5	none	2.16	Tansei	2.5	38	LMT					N	Lt.TFI	N	Y		N	杉江 多久郎	Y	38	2	#5	Y	none	1	45
N	Y	1061	N	N	71733226	M	67	N	N	100	1VD	B2	Y	Excentric	none	Y	Y	6	Y	tubular	11.28		2.5	2.5	none	2.4	Tansei	2.5	18	LAD					N	Rt.TRI	N	Y		N	杉江 多久郎	Y	24	15	#9	N	none	0	43
Y	Y	212	N	N	71733354	M	75	N	N	55	1VD	A	N	Concentric	none	N	Y	6	Y	discrete	6.57	0.92		2.25	none	2.03	Tansei	2.25	24	RCA					N	Rt.TRI	N	N	冠動脈破裂 / 穿孔	Y	只野 雄飛	Y	20	37	#4PD	N	none	0	41
Y	Y	212	N	N	71702206	F	80	N	N	78	2VD	C	N	Concentric	none	N	Y	6	Y	diffuse	15.01	0.38	3.5	2.25	none	1.77	Tansei	2.25	38	LCX					N	Rt.TRI	N	Y		N	菅野 大太郎	Y	11	45	#13	N	none	0	120
N	Y	1261	N	N	71404641	M	62	N	N	70	1VD	B2	N	Excentric	none	Y	Y	6	Y	discrete	12.44	0.79	3.5	2.5	none	2.62	Tansei	2.5	18	LAD					N	Rt.TRI	N	Y		N	松名 伸記	Y	37	49	#7	N	none	0	27
N	Y	1197	N	N	71700814	M	70	N	N	70	3VD	B2	N	Excentric	moderate	Y	Y	6	Y	tubular	13.45	0.48	3.0	2.5	none	1.58	Tansei	2.5	24	LAD					N	Rt.TFI	N	Y		N	八戸 大輔	Y	42	21	#6	Y	moderate	0	235
N	Y	355	N	N	71733790	M	79	N	N	79	1VD	B2	N	Excentric	none	N	Y	6	Y	tubular	14.21	0.38	3.0	2.5	none	1.8	Tansei	2.5	38	LAD					N	Rt.TRI	N	Y		N	八戸 大輔	Y	13	1	#6	N	none	0	61
N	Y	719	N	N	71727946	M	73	N	N	60	1VD	B2	N	Excentric	none	Y	Y	6	Y	tubular	9.35	1.04	3.0	2.5	none	2.58	Tansei	2.5	24	LAD					N	Rt.TRI	N	Y		N	松名 伸記	Y	33	0	#6	N	none	0	108
Y	Y	1175	N	N	70469451	F	62	N	N	59	2VD	B2	N	Excentric	none	N	Y	6	Y	discrete	4.75	0.78	2.5	2.5	none	1.92	Tansei	2.5	15	LAD					N	Rt.TRI	N	Y		N	菅野 大太郎	Y	18	36	#7	N	moderate	0	217
N	Y	473	N	N	71728921	F	92	N	N	56	3VD	B1	N	Excentric	none	N	Y	6	Y	discrete	6.46	0.81		2.25	none	1.85	Tansei	2.25	28	RCA	RCA				N	Rt.TRI	N	N		N	藤田 勉	Y	18	37	#4AV	N	none	0	28
	N	0			71733628	F	73			61	3VD	B1	N	Concentric	none	N	Y	6	Y	tubular	17.31	1.03	3.0	2.25	none	2.65	Tansei	2.5	33	RCA					N	Rt.TRI	N	Y		N	渡邊 智彦	Y	14	20	#4PD	N	none	0	49
Y	Y	1264	N	N	71108609	M	72	N	N	83	3VD	B2	N	Excentric	none	Y	Y	6	Y	tubular	12.46	0.46	2.5	2.5	none	2.78	Tansei	2.5	18	RCA					N	Rt.TFI	N	Y		N	金子 海彦	Y	21	46	#4PD	N	moderate	1	298
N	Y	1296	N	N	71731758	F	86	N	N	84	1VD	C	N	Excentric	none	N	Y	6	Y	diffuse	19.14	0.31	2.5	2.25	none	1.9	Tansei	2.5	33	LAD					N	Rt.TRI	N	Y		N	渡邊 智彦	Y	11	43	#7	N	none	0	122
N	Y	1117	N	N	71353067	M	59	N	N	56	1VD	B2	N	Excentric	none	Y	Y	6	Y	discrete	8.4	1.2	2.5	2.5	none	2.75	Tansei	2.5	28	LAD					N	Rt.TRI	N	Y		N	渡邊 智彦	Y	17	27	#7	N	moderate	1	97
Y	Y	388	Y	N	70408311	M	70	Y	N	73	1VD	B2	N	Concentric	moderate	Y	Y	6	Y	tubular	12.42	0.52	2.5	2.25	none	1.92	Tansei	2.25	28	LAD					N	Rt.TRI	N	Y		N	松名 伸記	Y	73	46	#9	Y	moderate	1	246
	N	0			71762964	M	55			81	2VD	B1	N	Excentric	none	N	Y	6	Y	discrete	15.22	0.53	2.25	2.25	none	2.78	Tansei	2.25	28	LCX					N	Rt.TRI	N	Y		N	菅野 大太郎	Y	7	24	#13	N	none	0	62
N	Y	1306	N	N	71672913	F	72	N	N	64	1VD	B2	N	Excentric	none	N	Y	6	Y	tubular	12.58	0.64	2.5	2	none	1.78	Tansei	2.25	38	LCX					N	Rt.TRI	N	Y		N	松名 伸記	Y	43	4	#13	N	none	0	65
N	Y	792	N	N	71730788	M	80	N	N	74	2VD	C	N	Excentric	none	Y	Y	6	Y	diffuse	9.85	0.47	2.5	2.25	none	1.85	Tansei	2.25	38	LCX					N	Rt.TRI	N	Y		N	松名 伸記	Y	14	1	#15	N	moderate	0	77
N	Y	1191	N	N	71764067	F	87	N	N	52	3VD	C	N	Excentric	none	Y	Y	6	Y	diffuse	7.35	0.84	2.25	2.25	moderate	1.78	Tansei	2.25	38	LCX					N	Rt.TRI	Y	Y		N	菅野 大太郎	Y	51	11	#14	N	moderate	0	97
[truncated: 29 more columns]
